1           **Medical Costs, Health Care Utilization, and Productivity Losses Associated With**  
2           **Hypertension by COVID-19 Among US Commercial Enrollees**

3  
4           Jun Soo Lee, PhD<sup>1</sup>; Yidan (Xue) Zhang, PhD<sup>1,2</sup>; Yu Wang, PhD<sup>3,4</sup>; Joohyun Park, PhD<sup>5</sup>;  
5           Ashutosh Kumar, PhD<sup>1,6</sup>; Bruce Donald, MA<sup>1,2</sup>; Feijun Luo, PhD<sup>1\*</sup>; Kakoli Roy, PhD<sup>7\*</sup>

6  
7           <sup>1</sup> Division for Heart Disease and Stroke Prevention, Centers for Disease Control and Prevention,  
8           Atlanta, Georgia

9           <sup>2</sup> ASRT, Inc., Atlanta, Georgia

10           <sup>3</sup> Division of Workforce Development, Centers for Disease Control and Prevention, Atlanta,  
11           Georgia

12           <sup>4</sup> Data Science and Evaluation Team, American Heart Association, Dallas, Texas

13           <sup>5</sup> Division of Drug Overdose Prevention, Centers for Disease Control and Prevention, Atlanta,  
14           Georgia

15           <sup>6</sup> Bizzell US, New Carrollton, Maryland

16           <sup>7</sup> National Center for Chronic Disease Prevention and Health Promotion, Centers for Disease  
17           Control and Prevention, Atlanta, Georgia

18  
19  
20           \* Feijun Luo and Kakoli Roy are co-senior authors.

21  
22  
23           Keywords: hypertension, productivity loss, productivity costs, medical costs, health care  
24           utilization, commercial insurance, COVID-19

25  
26           Word count: 3,106

27           Abstract: 321; Figures: 1; Tables: 3; eTables: 4; References: 43

28           Corresponding author:

29           Jun Soo Lee, PhD

30           Division for Heart Disease and Stroke Prevention

31           Centers for Disease Control and Prevention

32           4770 Buford Hwy, Building 107

33           Atlanta, GA 30341

34           Tel: 770-488-8978

35           Email: PQA2@cdc.gov

36  
37           Disclaimer: The findings and conclusions in this article are those of the authors and do not  
38           necessarily represent the official position of the Centers for Disease Control and Prevention. Use  
39           of trade names and commercial sources is for identification only and does not imply endorsement  
40           by the US Department of Health and Human Services.

41  
42           There is no potential conflict of interest related to any part of this article.

44 Sources of funding: The authors received no financial support for the research, authorship,  
45 and/or publication of this article.

46  
47 Acknowledgements: We thank Michael Schooley, Janet Wright, and Fátima Coronado (Centers  
48 for Disease Control and Prevention) for their guidance, suggestions, and manuscript review. We  
49 would like to thank Moira Urich (the Centers for Disease Control and Prevention) for review of  
50 this manuscript.

51 **Abstract**

52

53 **Background:** Hypertension is a major risk factor for cardiovascular and renal diseases,  
54 significantly contributing to morbidity and mortality. The COVID-19 pandemic has heightened  
55 concerns about the impact of hypertension on severe COVID-19 outcomes.

56

57 **Methods:** We conducted a cross-sectional analysis using the 2021 MarketScan Commercial and  
58 Health and Productivity Management databases. The study included adults aged 18-64 with  
59 continuous employer-sponsored private insurance, excluding those with pregnancy or capitated  
60 plans. We compared excess total medical costs, healthcare utilization (including the number of  
61 emergency department [ED] visits, inpatient admissions, outpatient visits, and outpatient  
62 prescription drugs), and productivity losses and related costs due to sick absences, short-term  
63 disability (STD), and long-term disability (LTD) between individuals with and without  
64 hypertension, further stratified by COVID-19 diagnosis. Multivariate regression models adjusted  
65 for demographics and comorbidities were used to estimate the differences in outcomes.

66

67 **Results:** Among 1,612,398 adults aged 18-64 years, 13% had hypertension in 2021. Those with  
68 hypertension were older, were less likely to be female or live in urban areas, and exhibited a  
69 higher prevalence of comorbidities. The total excess medical costs associated with hypertension  
70 were \$8723 per patient (95% CI, \$8352-\$9093), which was significantly higher by \$6117 (95%  
71 CI, \$4780-\$7453) among individuals diagnosed with COVID-19. Persons with hypertension had  
72 higher health care utilization, including a higher number of ED visits (0.21 per patient; 95% CI,  
73 0.21-0.22), inpatient admissions (0.11; 95% CI, 0.10-0.12), outpatient visits (5.42; 95% CI, 5.36-  
74 5.49), and outpatient prescription drugs (10.85; 95% CI, 10.75-10.94). Moreover, they  
75 experienced a greater number of sick absences (1.22 days; 95% CI, 1.07-1.36) and STD  
76 occurrences (3.68 days; 95% CI, 3.38-3.98) per patient compared to those without hypertension.  
77 These trends were further exacerbated among individuals diagnosed with COVID-19.

78

79 **Conclusions:** Hypertension markedly increases medical costs, healthcare utilization, and  
80 productivity losses, which are further exacerbated by COVID-19. These findings highlight the  
81 substantial economic burden of managing hypertension in the context of the COVID-19  
82 pandemic and underscore the importance of targeted interventions.

## 83 INTRODUCTION

84 Hypertension (ie, high blood pressure [BP]) is a major risk factor of cardiovascular and renal  
85 diseases, which are among the leading contributors of all-cause mortality.<sup>1,2</sup> Recent national  
86 estimates indicate that approximately 122 million (47%) adults aged 20 years and older have  
87 hypertension in the United States (US).<sup>3,4</sup> Moreover, hypertension has been consistently linked to  
88 elevated health care utilization and increased medical cost.<sup>5-8</sup> For instance, in 2019, hypertension  
89 was implicated in over 18 million hospital discharges, with 1.4 million cases wherein  
90 hypertension was the primary diagnosis.<sup>3,9</sup> The estimated medical cost associated with  
91 hypertension was reported to be \$1500 per person per year in 2012-2013, contributing to a  
92 staggering \$109 billion (in 2015 US dollars) in total annual medical cost nationwide.<sup>6</sup>

93 In addition to direct medical costs, hypertension is associated with productivity loss  
94 among working-age adults.<sup>10</sup> Hypertension often goes unnoticed and remains untreated or  
95 uncontrolled, indicating BP levels persistently above the recommended thresholds,<sup>11</sup> among  
96 working-age adults.<sup>12</sup> For example, 93.4% and 74.4% of hypertensive adults in the US aged 18-  
97 44 and 45-64 years had uncontrolled hypertension, respectively, compared with 69.7% of adults  
98 aged 65 years and above.<sup>13</sup> Uncontrolled hypertension is associated with comorbidities that can  
99 lead to productivity loss. A systematic literature review of studies published from 1990 through  
100 2015 suggests that hypertension-associated absenteeism, presenteeism, and short-term disability  
101 cost upwards of \$60, \$70, and \$50 per person per year, respectively, resulting in billions of  
102 dollars in total annual productivity loss nationwide (eg, \$11 billion from absenteeism alone).<sup>10,14-</sup>

103 <sup>16</sup>

104 In parallel, emerging evidence following the onset of the COVID-19 pandemic has  
105 pointed to greater morbidity and mortality among COVID-19 patients with comorbid

106 hypertension.<sup>17-19</sup> However, research also indicates that hypertension may independently affect  
107 COVID-19 prognosis through heightened immunological activity and organ damage, primarily  
108 in those with uncontrolled systolic BP.<sup>20,21</sup> Compared with peers without hypertension, COVID-  
109 19 patients with hypertension are significantly more likely to be hospitalized and require  
110 treatment in the intensive care unit.<sup>17,18</sup> Also, COVID-19 infections may lead to the onset of  
111 hypertension in people without preexisting hypertension.<sup>22</sup>

112         Despite this growing body of evidence, a significant gap remains in understanding the  
113 interaction between hypertension and COVID-19,<sup>23-25</sup> especially regarding the impact on medical  
114 costs, health care utilization, and productivity losses.<sup>26-29</sup> To bridge this gap, our study aims to  
115 investigate the economic burden of hypertension during the COVID-19 pandemic, specifically  
116 focusing on medical costs, health care utilization, and productivity losses among employed  
117 adults aged 18-64 years with employer-sponsored private insurance. Additionally, the study  
118 seeks to delineate variations in hypertension-related medical costs and productivity losses based  
119 on COVID-19 diagnosis status. By addressing these gaps, our study may elucidate the  
120 intertwined effects of COVID-19 and hypertension on total medical costs, health care utilization,  
121 and productivity loss.

122

123 **METHODS**

124 *Data*

125 We used the MarketScan Commercial and Health and Productivity Management (HPM)  
126 databases from 2021.<sup>30</sup> The MarketScan Commercial Database contained person-level paid  
127 claims and encounters, including medical costs (patients' out-of-pocket costs and insurance  
128 payments) and information on health care utilization, such as inpatient services, outpatient  
129 services, emergency department (ED) visits, and outpatient prescription drug claims. The data  
130 came from approximately 350 payers, encompassing over 20 billion service records provided by  
131 >300 employers, >30 health plans, and >500 hospitals nationwide.<sup>30</sup> The HPM Database  
132 contained detailed payroll-related information about employees, including sick absences, short-  
133 term disability (STD), and long-term disability (LTD). All data were de-identified, and the study  
134 was exempt from review by the Institutional Review Board of the Centers for Disease Control  
135 and Prevention.

136

137 *Identification of Patients With Hypertension*

138 Our sample included employed individuals aged 18-64 years who were continuously enrolled in  
139 an employer-sponsored insurance plan throughout 2021. The sample excluded individuals with a  
140 pregnancy diagnosis (codes listed in eTable 1) or with capitated insurance in 2021. Finally, we  
141 limited the analytic sample to individuals in the HPM Database, who had complete information  
142 on absences, STD, or LTD in 2021. Because not all employers provided payroll information, we  
143 stratified the sample by individuals with medical cost, sick absence, and STD or LTD  
144 information. In each stratified subsample, we identified individuals with hypertension if they had  
145 at least 1 inpatient or ED visit or 2 outpatient visits containing a hypertension diagnosis

146 (International Classification of Diseases, 10th Revision, Clinical Modification [ICD-10-CM] I10  
147 through I15) in 2021 (eTable 1).

148

#### 149 ***Outcome Variables***

150 The primary outcome variables, measured in per person per year, are (1) total medical costs (sum  
151 of patients' out-of-pocket costs and insurance payments), (2) health care utilization, including the  
152 number of ED visits, inpatient admissions, outpatient visits, and outpatient prescription drugs, (3)  
153 total missed workdays related to sick absences, STDs, and LTDs, and (4) productivity costs  
154 calculated on total missed 8-hour workdays due to sick absences, STDs, and LTDs in 2021.  
155 Estimated employer productivity costs were computed by multiplying the number of hours  
156 absent from the number of missed workdays times 8 hours, with the average hourly wage in  
157 2021.<sup>31</sup> We adjusted for absences associated with STD (70% of hourly wage) and LTD (60% of  
158 hourly wage).<sup>31,32</sup> The average hourly wage (\$30.61) for all employees in private nonfarm  
159 payrolls was obtained from the 2021 US Bureau of Labor Statistics (BLS).<sup>33</sup>

160

#### 161 ***Independent Variable***

162 The primary independent variable is a binary variable indicating whether individuals had  
163 hypertension in 2021. We interacted this variable with a binary indicator for COVID-19  
164 diagnosis (individuals with ICD-10-CM of U07.1 in 2021) to examine the interaction between  
165 hypertension and COVID-19 with respect to the outcome variables.

166

#### 167 ***Control Variables***

168 All models were adjusted for age groups (aged 18-34 [reference], 35-44, 45-54, and 55-64  
169 years), sex (female [reference], male), residency (rural [reference] and urban),<sup>34</sup> census region  
170 (Northeast [reference], Midwest, South, and West), and comorbidities. Comorbidities were  
171 defined using 17 conditions outlined in the Quan Charlson Comorbidities.<sup>35</sup> Each comorbidity  
172 was identified if individuals had  $\geq 1$  inpatient admission or  $\geq 2$  outpatient encounters ( $\geq 30$  days  
173 apart) using the ICD-10-CM diagnosis codes as specified in Quan et al.<sup>35</sup>

174

### 175 *Statistical Analysis*

176 We first documented summary statistics of patients' characteristics, including age, sex, rural-  
177 urban residence, census region, and comorbidities. We tested the differences in average values  
178 by hypertension diagnosis status using the Wilcoxon rank-sum test for continuous variables and  
179 Pearson's chi-square test for categorical variables.

180 In the regression analyses, where the dependent variables were total medical costs and  
181 productivity costs (related to sick absences, STD, and LTD), we used a generalized linear model  
182 (GLM) with a log-link function and gamma distribution. For dependent variables that were count  
183 variables, specifically outcomes related to health care utilization (including the number of ED  
184 visits, inpatient admissions, and outpatient prescription drugs) and missed workdays (due to sick  
185 absences, STD, and LTD), a negative binomial regression model was used. We ran separate  
186 regressions for each dependent variable to estimate the association with hypertension status (with  
187 and without hypertension) as well as the association including the interaction of hypertension  
188 status and COVID-19 diagnosis (with and without COVID-19). The remaining control variables  
189 were the same for all models. We reported the predicted outcomes variables in terms of average  
190 marginal effects (AMEs) for individuals, both with and without hypertension, and for those with



191 and without COVID-19. Furthermore, we documented the differences in the estimated AMEs by  
192 combined hypertension status and by COVID-19 diagnosis status. AMEs represent the change in  
193 the predicted outcome variables associated with a one-unit change in the independent variable,  
194 holding all other variables constant. AMEs provide estimates of the predicted changes in  
195 outcomes resulting from variations in hypertension and COVID-19 diagnosis. We defined the  
196 differences in AMEs associated with hypertension and COVID-19 diagnosis status as “excess”  
197 outcomes associated with hypertension and COVID-19.

198 In the sensitivity analysis, we applied a zero-inflated negative binomial regression model  
199 for the count variables—specifically missed workdays attributable to sick absences, STD, and  
200 LTD—and a two-part model for productivity costs due to potential excess zero values in the  
201 dependent variables. In the two-part model, we first used a logistic regression to estimate the  
202 probability of non-zero expenditures, followed by GLM regression with log-link in the second  
203 part.

204 All analyses used 2021 data, which was the most recently available data. Also, there  
205 might have been interruptions to medical care during the early COVID-19 pandemic in 2020,<sup>36,37</sup>  
206 as the severity of COVID-19 and its relationship with hypertension might have been different  
207 during the early and middle stages of the pandemic. To test this potential interruption, we  
208 conducted additional sensitivity analyses using 2020 data. The sensitivity analysis results using  
209 2020 were adjusted to 2021 dollars using the Consumer Price Index from the US BLS.<sup>38</sup>

210 Two-tailed tests with *P* values of <0.05 were used to indicate statistical significance. All  
211 analyses were conducted using Stata SE version 17 (StataCorp, College Station, Texas).

212

## 213 **RESULTS**

214 We identified 1 612 398 employed individuals aged 18-64 years who were continuously enrolled  
215 in a noncapitated employer-sponsored private insurance plan without a pregnancy history in  
216 2021 (Figure 1). Among these individuals, 139 490 (9%) had non-missing information on  
217 workplace absences, 1 355 064 (84%) had non-missing information on STD, and 1 331 963  
218 (83%) had non-missing information on LTD. A total of 215 480 (13%) individuals had  
219 hypertension in 2021. Persons with hypertension were older (51.2 vs 42.9 years;  $P < 0.001$ ), were  
220 less likely to be female (34.0% vs 39.4%;  $P < 0.001$ ), were less likely to reside in urban areas  
221 (90.4% vs 92.7%;  $P < 0.001$ ), and had a higher likelihood of having comorbidities ( $P < 0.001$  in  
222 all comorbidities) (Table 1).

223 Table 2 presents the total adjusted medical costs and health care utilization associated  
224 with hypertension, including by COVID-19 diagnosis. The mean total excess medical costs  
225 associated with hypertension compared to those without hypertension were \$8723 per patient per  
226 year (95% CI, \$8352-\$9093;  $P < 0.001$ ). The total excess medical costs associated with  
227 hypertension were significantly higher among persons with COVID-19 than those without  
228 COVID-19 (\$14 290 vs \$8173; the difference was \$6117 [95% CI, \$4780-\$7453;  $P < 0.001$ ]).  
229 Individuals with hypertension had a higher number of ED visits (0.211 per patient; 95% CI,  
230 0.207-0.216;  $P < 0.001$ ), inpatient admissions (0.108; 95% CI, 0.101-0.115;  $P < 0.001$ ),  
231 outpatient visits (5.422; 95% CI, 5.357-5.486;  $P < 0.001$ ), and outpatient prescription drugs  
232 (10.85; 95% CI, 10.75-10.94;  $P < 0.001$ ) than those without hypertension (Table 2). Compared  
233 with adults without COVID-19 diagnosis, those with COVID-19 had a significantly higher  
234 number of excess ED visits (0.128; 95% CI, 0.105-0.151;  $P < 0.001$ ), inpatient admission (0.293;  
235 95% CI, 0.259-0.328;  $P < 0.001$ ), and outpatient prescription drugs (0.452; 95% CI, 0.132-0.772;  
236  $P < 0.001$ ) associated with hypertension compared to those without hypertension (Table 2).

237 Table 3 documents the productivity losses and costs associated with hypertension by  
238 COVID-19 diagnosis. Individuals with hypertension had a higher number of sick absences  
239 (1.215 days per patient; 95% CI, 1.068-1.362;  $P < 0.001$ ), STD (3.680; 95% CI, 3.381-3.980;  
240  $P < 0.001$ ), and higher sick absence costs (\$297.3 per patient; 95% CI, \$254.1-\$340.6;  $P < 0.001$ )  
241 and STD costs (\$631.0; 95% CI, \$591.4-\$670.7;  $P < 0.001$ ). Compared with persons without  
242 COVID-19 diagnosis, those with COVID-19 had a significantly higher number of excess STD  
243 (2.412; 95% CI, 0.837-3.987;  $P < 0.01$ ) and STD costs (\$413.6; 95% CI, \$205.0-\$622.2;  
244  $P < 0.001$ ) associated with hypertension.

245 The sensitivity analyses using a zero-inflated negative binomial and a two-part model are  
246 presented in eTable 2. The magnitudes and directions were similar to results from the main  
247 analyses, except the number and costs of LTD by COVID-19 diagnosis status became  
248 statistically significant.

249 eTables 3 and 4 presented the same results as Tables 2 and 3 using 2020 data. The total  
250 medical costs associated with hypertension were \$8961 (95% CI, \$8478-\$9445;  $P < 0.001$ ) in  
251 2020 (eTable 3), very similar to the 2021 estimate of \$8723 using 2021 data (Table 2). On the  
252 other hand, the differences in total excess medical costs associated with hypertension by  
253 COVID-19 diagnosis status were much higher in 2020 estimates (\$18 167; 95% CI, \$14 320-  
254 \$22 014;  $P < 0.001$ ) than 2021 estimates (\$6117; 95% CI, 4780-7453) (Table 2). The differences  
255 in excess inpatient admission associated with hypertension by COVID-19 diagnosis status were  
256 0.986 per patient (95% CI, 0.825-1.147;  $P < 0.001$ ) (eTable 3), more than 3 times higher than the  
257 0.293 estimate using 2021 data (Table 2). Similarly, the differences in the number of excess ED  
258 visits and outpatient prescription drugs were higher in 2020 than in 2021. The estimated

259 differences of excess productivity losses, and costs associated with hypertension by COVID-19  
260 diagnosis in 2020 (eTable 4), were similar to estimates in 2021.

261

## 262 **DISCUSSION**

263 This is the first study to assess the excess medical costs, health care utilization, and productivity-  
264 related outcomes and costs associated with hypertension by COVID-19 diagnosis. In 2021,  
265 adults aged 18-64 years with employer-sponsored private insurance experienced an estimated  
266 excess medical cost of \$8723 per patient associated with hypertension. Meanwhile, the combined  
267 productivity loss attributable to hypertension resulting from sick absences and STD was \$928 per  
268 patient. Furthermore, patients with hypertension who had a COVID-19 diagnosis exhibited  
269 significantly higher medical costs compared to those without COVID-19. Overall, the excess  
270 medical cost associated with hypertension was \$6117 higher for individuals with a COVID-19  
271 diagnosis in comparison to those without a COVID-19 diagnosis. Furthermore, a COVID-19  
272 diagnosis was associated with a \$414 increase in hypertension-associated excess STD-related  
273 costs, whereas sick absences and LTD-related productivity losses were not significantly different  
274 for persons with and without COVID-19. The higher medical cost associated with hypertension  
275 among patients with a COVID-19 diagnosis was primarily driven by increased ED visits,  
276 inpatient admissions, and outpatient prescription drugs.

277       Given the interdependent relationship between hypertension and COVID-19 in our  
278 regression models, our findings can also be interpreted as excess costs, utilization and  
279 productivity losses associated with COVID-19 diagnosis among individuals with and without  
280 hypertension. For instance, total medical costs associated with COVID-19 can be interpreted as  
281 being significantly higher among persons with hypertension compared to those without.

282 Similarly, other health care utilization and productivity outcomes indicated considerably higher  
283 associations with COVID-19 diagnosis among individuals with hypertension compared to those  
284 without.

285 Our findings are consistent with prior research, indicating elevated number of ED visits,  
286 inpatient and outpatient treatment, and medication use among adults with hypertension compared  
287 to those without.<sup>5,6</sup> However, our estimated medical cost associated with hypertension (\$8723  
288 per patient per year) significantly surpasses prepandemic estimates derived from national  
289 household surveys, which were typically \$1500-\$2500 per person annually.<sup>5-7</sup> Several factors  
290 may underlie these discrepancies. First, the focus of our study on the COVID-19 period may  
291 inherently differ from prepandemic studies, in terms of health care utilization and medical costs.  
292 Second, our study may differ from prior research that encompassed individuals across various  
293 insurance types. This difference may explain variations in costs between privately insured  
294 employed adults in our study, and previous studies' populations, which likely also included those  
295 covered by public insurance as well as uninsured population. Third, previous studies using  
296 survey data identified individuals with lifetime hypertension, whereas our analysis, based on  
297 claims databases, focused on individuals diagnosed with hypertension within the study year.  
298 Adults with documented lifetime hypertension in survey databases may have received ongoing  
299 management and control for their condition, potentially resulting in lower recorded hypertension-  
300 related medical costs compared to those diagnosed within our study sample. And fourth, our  
301 stringent criteria for identifying individuals with hypertension—requiring them to have at least 1  
302 inpatient admission or 2 outpatient visits with a hypertension diagnosis—might have  
303 inadvertently excluded individuals with less severe hypertension.

304 Preexisting hypertension may increase the risk of severe COVID-19 symptoms; likewise,  
305 COVID-19 may be associated with subsequent onset or exacerbation of hypertension.<sup>20-22,39</sup> For  
306 example, existing evidence has linked hypertension with increased hyperinflammatory responses  
307 following a SARS-CoV-19 infection, which may contribute to a more severe trajectory of  
308 COVID-19.<sup>20</sup> In a study involving more than 5500 inpatients with COVID-19 who had no  
309 history of hypertension, 21% developed new-onset hypertension during hospitalization.<sup>22</sup> The  
310 potential correlation between hypertension and more severe COVID-19 symptoms may in part  
311 explain our findings that hypertension-related health care utilization and costs are higher among  
312 persons with a COVID-19 diagnosis.<sup>24,40</sup>

313 Also, in our sensitivity analysis, we observed significantly higher medical costs associated  
314 with hypertension among those diagnosed with COVID-19 in 2020 compared to 2021. The  
315 introduction of mRNA-based COVID-19 vaccines, proven safe and effective for individuals with  
316 hypertension,<sup>41</sup> might have played a role in the reduction of hypertension-related medical costs in  
317 2021 vs 2020.<sup>42</sup> Further exploration may be required to understand the temporal impact of  
318 vaccination on hypertension disease severity and medical costs. Understanding the evolving  
319 dynamics between COVID-19 disease management, vaccination programs, and associated  
320 medical costs—especially among those with poor baseline health and/or comorbidities like  
321 hypertension—may help assess the broader implications of COVID-19 interventions on health  
322 care costs and outcomes.

323 Lastly, prior research has consistently demonstrated the substantial impact of hypertension  
324 on productivity, contributing to increased work absences, compromised on-the-job productivity,  
325 and heightened disabilities.<sup>10</sup> Our study further contributes to this literature by unveiling the  
326 compounded effect of a COVID-19 diagnosis on productivity losses associated with

327 hypertension. This finding illuminates the intricate interplay between COVID-19 and  
328 hypertension, encouraging a reevaluation of the broader economic repercussions of the  
329 pandemic. In this context, it becomes crucial for future investigations to not only account for the  
330 direct medical and productivity costs linked to COVID-19 treatment but also to consider the  
331 additional economic burden in managing concurrent chronic conditions such as hypertension.  
332 Understanding and addressing these intertwined health care challenges are pivotal for devising  
333 comprehensive strategies aimed at mitigating the multidimensional impacts of global health  
334 crises, exemplified by the ongoing challenges posed by COVID-19.

335

### 336 **Limitation**

337 This study is subject to several limitations. First, the MarketScan Commercial Database,  
338 sourced from large employers, represents a convenience sample, limiting the generalizability of  
339 findings to privately insured individuals with payroll information. Consequently, the study  
340 findings cannot be generalized to the broader spectrum of privately insured US adults. Second,  
341 the findings might not accurately represent individuals lacking health insurance or covered by  
342 public insurance programs like Medicare and Medicaid. Notably, one of our primary outcomes—  
343 productivity losses—is contingent upon data from employers' payroll systems, thereby excluding  
344 persons without employment or those covered by public insurance. Third, our study focused  
345 solely on surviving individuals with hypertension and COVID-19, precluding the assessment of  
346 costs and productivity due to mortality. Fourth, we were unable to ascertain the severity levels of  
347 hypertension and COVID-19, which could have distinct effects on the outcomes, potentially  
348 leading to an underestimation of our results. Lastly, while emerging evidence links hypertension  
349 with an elevated risk of Long COVID symptoms,<sup>43</sup> our cross-sectional data precluded an

350 evaluation of the longitudinal impact of a COVID-19 diagnosis on hypertension-related health  
351 care utilization and economic costs.

352

## 353 **CONCLUSIONS**

354         The economic burden of hypertension, in terms of medical costs and productivity loss, is  
355 substantial. Our study reveals that individuals diagnosed with COVID-19 incurred even higher  
356 excess medical costs, health care utilization, and productivity losses attributable to hypertension.  
357 These findings emphasize the importance of factoring in costs of chronic comorbidities in  
358 assessing the overall economic burden of COVID-19. These estimates can help assess the  
359 economic impact (eg, costs averted) of interventions effective in preventing COVID-19 among  
360 individuals with preexisting hypertension.



## REFERENCES

1. Aune D, Huang W, Nie J, Wang Y. Hypertension and the risk of all-cause and cause-specific mortality: an outcome-wide association study of 67 causes of death in the National Health Interview Survey. *BioMed Research International*. 2021;2021
2. Xu J, Murphy SL, Kochanek KD, Arias E. Mortality in the United States, 2021. *NCHS Data Brief*. Dec 2022;(456):1-8.
3. Tsao CW, Aday AW, Almarzooq ZI, et al. Heart Disease and Stroke Statistics—2023 Update: A Report From the American Heart Association. *Circulation*. 2023;147(8):e93-e621. doi:doi:10.1161/CIR.0000000000001123
4. Centers for Disease Control and Prevention (CDC) National Center for Health Statistics (NCHS). Data from: National Health and Nutrition Examination Survey Data, 2017-2020. 2020. Hyattsville, MD: U.S. Department of Health and Human Services, Centers for Disease Control and Prevention.
5. Kirkland EB, Heincelman M, Bishu KG, et al. Trends in healthcare expenditures among US adults with hypertension: national estimates, 2003–2014. *Journal of the American Heart Association*. 2018;7(11):e008731.
6. Zhang D, Wang G, Zhang P, Fang J, Ayala C. Medical expenditures associated with hypertension in the US, 2000–2013. *American journal of preventive medicine*. 2017;53(6):S164-S171.
7. Wang G, Zhou X, Zhuo X, Zhang P. Annual total medical expenditures associated with hypertension by diabetes status in US adults. *American journal of preventive medicine*. 2017;53(6):S182-S189.
8. Mitchell EM. Concentration of healthcare expenditures and selected characteristics of persons with high expenses, U.S. Civilian Noninstitutionalized Population, 2020. *Statistical Brief (Medical Expenditure Panel Survey (US))*. Agency for Healthcare Research and Quality (US); 2023.
9. Data from: HCUP National Inpatient Sample (NIS). Healthcare Cost and Utilization Project (HCUP). 2019. Agency for Healthcare Research and Quality, Rockville, MD.
10. MacLeod KE, Ye Z, Donald B, Wang G. A literature review of productivity loss associated with hypertension in the United States. *Population Health Management*. 2022;25(3):297-308.
11. Whelton PK, Carey RM, Aronow WS, et al. 2017 ACC/AHA/AAPA/ABC/ACPM/AGS/APhA/ASH/ASPC/NMA/PCNA guideline for the prevention, detection, evaluation, and management of high blood pressure in adults: a report of the American College of Cardiology/American Heart Association Task Force on Clinical Practice Guidelines. *Journal of the American College of Cardiology*. 2018;71(19):e127-e248.
12. Wall HK, Hannan JA, Wright JS. Patients with undiagnosed hypertension: hiding in plain sight. *JAMA*. 2014;312(19):1973-1974. doi:10.1001/jama.2014.15388
13. Centers for Disease Control and Prevention (CDC). Division of Heart Disease and Stroke Prevention. Estimated Hypertension Prevalence, Treatment, and Control Among U.S. Adults. Accessed November 1, 2023. <https://millionhearts.hhs.gov/data-reports/hypertension-prevalence.html>
14. Henke RM, Carls GS, Short ME, et al. The relationship between health risks and health and productivity costs among employees at Pepsi Bottling Group. *Journal of occupational and environmental medicine*. 2010:519-527.

15. Kowlessar NM, Goetzel RZ, Carls GS, Tabrizi MJ, Guindon A. The relationship between 11 health risks and medical and productivity costs for a large employer. *Journal of occupational and environmental medicine*. 2011;468-477.
16. Kirkham HS, Clark BL, Bolas CA, et al. Which modifiable health risks are associated with changes in productivity costs? *Population Health Management*. 2015;18(1):30-38.
17. Ebinger JE, Driver M, Joung S, et al. Hypertension and excess risk for severe COVID-19 illness despite booster vaccination. *Hypertension*. 2022;79(10):e132-e134.
18. Chen J, Liu Y, Qin J, et al. Hypertension as an independent risk factor for severity and mortality in patients with COVID-19: a retrospective study. *Postgraduate medical journal*. 2022;98(1161):515-522.
19. World Health Organization. (2021). *Hypertension and COVID-19: scientific brief, 17 June 2021*. World Health Organization. <https://iris.who.int/bitstream/handle/10665/341848/WHO-2019-nCoV-Sci-Brief-Hypertension-2021.1-eng.pdf>.
20. Trump S, Lukassen S, Anker MS, et al. Hypertension delays viral clearance and exacerbates airway hyperinflammation in patients with COVID-19. *Nature biotechnology*. 2021;39(6):705-716.
21. Gallo G, Calvez V, Savoia C. Hypertension and COVID-19: Current evidence and perspectives. *High Blood Pressure & Cardiovascular Prevention*. 2022;29(2):115-123.
22. Zhang V, Fisher M, Hou W, Zhang L, Duong TQ. Incidence of New-Onset Hypertension Post-COVID-19: Comparison With Influenza. *Hypertension*. 2023;80(10):2135-2148. doi:doi:10.1161/HYPERTENSIONAHA.123.21174
23. Du Y, Zhou N, Zha W, Lv Y. Hypertension is a clinically important risk factor for critical illness and mortality in COVID-19: A meta-analysis. *Nutrition, Metabolism and Cardiovascular Diseases*. 2021;31(3):745-755.
24. Peng M, He J, Xue Y, Yang X, Liu S, Gong Z. Role of Hypertension on the Severity of COVID-19: A Review. *Journal of cardiovascular pharmacology*. 2021;78(5):e648.
25. Batiha GE-S, Gari A, Elshony N, et al. Hypertension and its management in COVID-19 patients: The assorted view. *International Journal of Cardiology Cardiovascular Risk and Prevention*. 2021;11:200121.
26. Chopra V, Flanders SA, O'Malley M, Malani AN, Prescott HC. Sixty-Day Outcomes Among Patients Hospitalized With COVID-19. *Annals of Internal Medicine*. 2021/04/20 2020;174(4):576-578. doi:10.7326/M20-5661
27. Ohsfeldt RL, Choong CK-C, Mc Collam PL, Abedtash H, Kelton KA, Burge R. Inpatient Hospital Costs for COVID-19 Patients in the United States. *Advances in Therapy*. 2021/11/01 2021;38(11):5557-5595. doi:10.1007/s12325-021-01887-4
28. Di Fusco M, Shea KM, Lin J, et al. Health outcomes and economic burden of hospitalized COVID-19 patients in the United States. *Journal of Medical Economics*. 2021/01/01 2021;24(1):308-317. doi:10.1080/13696998.2021.1886109
29. Lee JS, Lowe Beasley K, Schooley MW, Luo F. Trends and Costs of US Telehealth Use Among Patients With Cardiovascular Disease Before and During the COVID-19 Pandemic. *Journal of the American Heart Association*. 2023;12(4):e028713.
30. Data from: Truven Health MarketScan® Research Databases. <https://marketscan.truvenhealth.com/marketscanportal> Accessed March 9, 2023.

31. Park J, Bigman E, Zhang P. Productivity Loss and Medical Costs Associated With Type 2 Diabetes Among Employees Aged 18–64 Years With Large Employer-Sponsored Insurance. *Diabetes care*. 2022;45(11):2553-2560.
32. Settupane RA, Kreindler JL, Chung Y, Tkacz J. Evaluating direct costs and productivity losses of patients with asthma receiving GINA 4/5 therapy in the United States. *Annals of Allergy, Asthma & Immunology*. 2019;123(6):564-572. e3.
33. U.S. Bureau of Labor Statistics, Average Hourly Earnings of All Employees, Total Private [CES0500000003], retrieved from FRED, Federal Reserve Bank of St. Louis; <https://fred.stlouisfed.org/series/CES0500000003>, October 3, 2023.
34. Ingram DD, Franco SJ. *2013 NCHS urban-rural classification scheme for counties*. US Department of Health and Human Services, Centers for Disease Control and ...; 2014.
35. Quan H, Sundararajan V, Halfon P, et al. Coding algorithms for defining comorbidities in ICD-9-CM and ICD-10 administrative data. *Medical care*. 2005;1130-1139.
36. Papautsky EL, Rice DR, Ghoneima H, et al. Characterizing health care delays and interruptions in the United States during the COVID-19 pandemic: internet-based, cross-sectional survey study. *Journal of medical Internet research*. 2021;23(5):e25446.
37. Czeisler MÉ, Marynak K, Clarke KE, et al. Delay or avoidance of medical care because of COVID-19–related concerns—United States, June 2020. *Morbidity and mortality weekly report*. 2020;69(36):1250.
38. U.S. Bureau of Labor Statistics, Consumer Price Index for All Urban Consumers: All Items in U.S. City Average [CPIAUCSL], retrieved from FRED, Federal Reserve Bank of St. Louis; <https://fred.stlouisfed.org/series/CPIAUCSL>, October 3, 2023.
39. Delalić Đ, Jug J, Prkačin I. ARTERIAL HYPERTENSION FOLLOWING COVID-19: A RETROSPECTIVE STUDY OF PATIENTS IN A CENTRAL EUROPEAN TERTIARY CARE CENTER. *Acta Clin Croat*. Jun 2022;61(Suppl 1):23-27. doi:10.20471/acc.2022.61.s1.03
40. Scott A, Ansari W, Khan F, et al. Substantial health and economic burden of COVID-19 during the year after acute illness among US adults at high risk of severe COVID-19. *BMC Medicine*. 2024/02/01 2024;22(1):46. doi:10.1186/s12916-023-03234-6
41. Shibata S, Kobayashi K, Tanaka M, et al. COVID-19 pandemic and hypertension: an updated report from the Japanese Society of Hypertension project team on COVID-19. *Hypertension Research*. 2023/03/01 2023;46(3):589-600. doi:10.1038/s41440-022-01134-5
42. Centers for Disease Control and Prevention (CDC). CDC Museum COVID-19 Timeline. Accessed November 1, 2023. <https://www.cdc.gov/museum/timeline/covid19.html>
43. Song Z, Giuriato M. Demographic And Clinical Factors Associated With Long COVID: Study examines demographic and clinical factors associated with long COVID among people who suffer symptoms long after they were first diagnosed with COVID-19 (long haulers). *Health Affairs*. 2023;42(3):433-442.

**Figure 1. Study Sample Selection of Patients Diagnosed With Hypertension, MarketScan® Commercial and Health and Productivity Management Database, 2021**

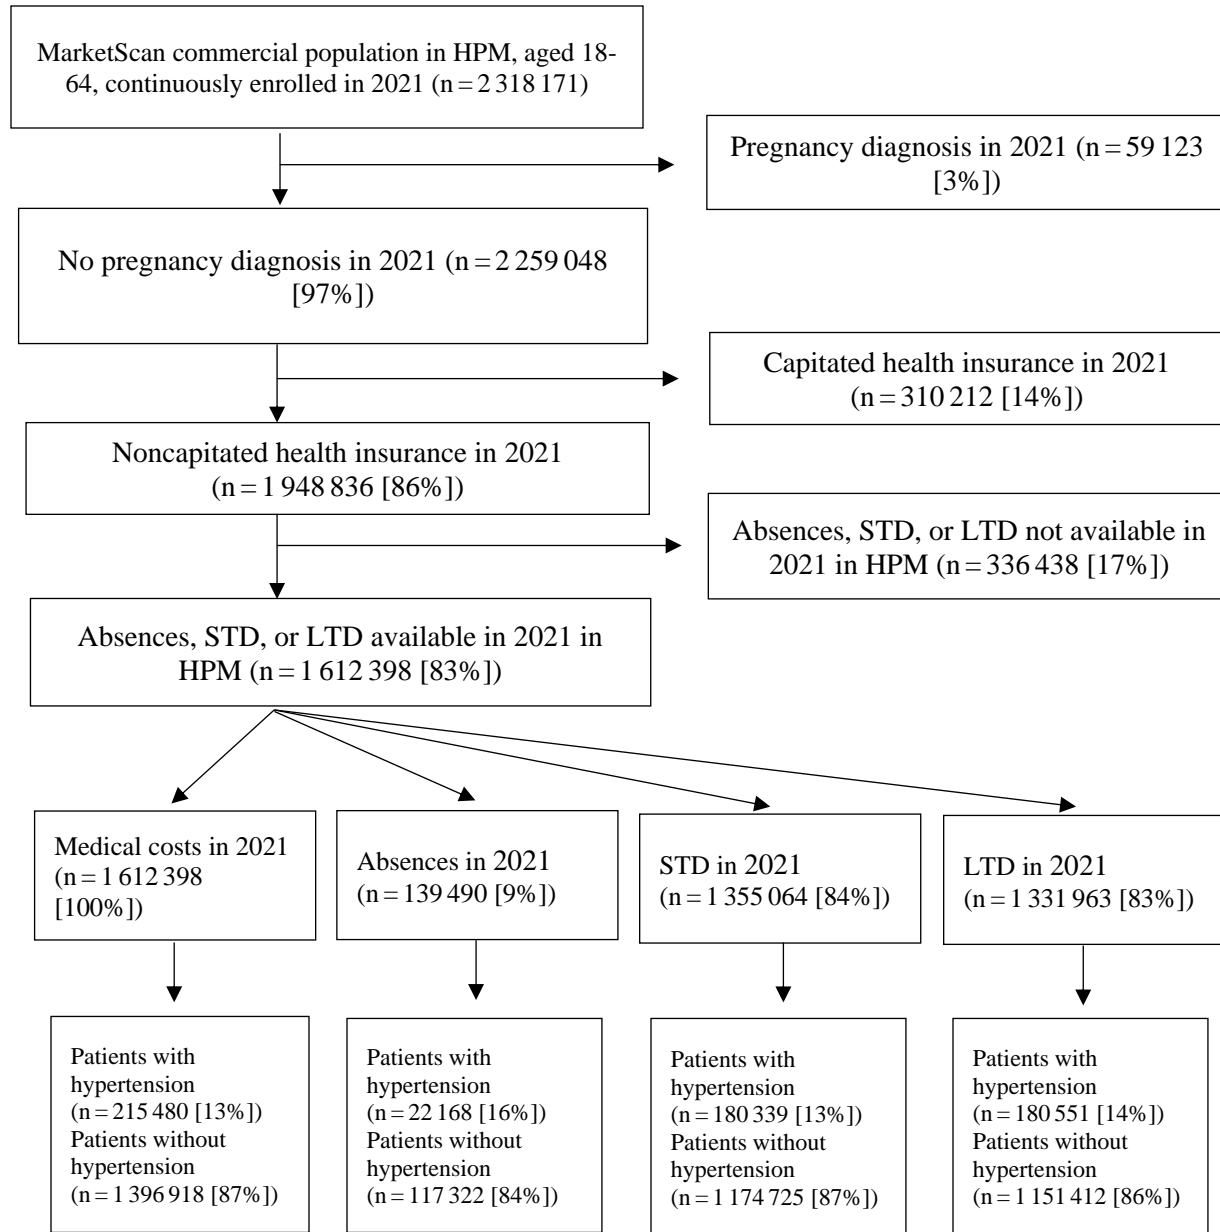

Abbreviations: HPM, Health and Productivity Management; LTD, long-term disability; STD, short-term disability.

43 **Table 1.** Summary Statistics, MarketScan® Commercial Insurance, 2021<sup>a</sup>

|                                       | All                | Without hypertension | With hypertension               |
|---------------------------------------|--------------------|----------------------|---------------------------------|
|                                       | N = 1 612 398      | N = 1 396 918        | N = 215 480                     |
| Age, mean (SD)                        | 44.0 (11.1)        | 42.9 (11.0)          | 51.2 (8.5) <sup>***</sup>       |
| <b>Age groups, n (%)</b>              |                    |                      |                                 |
| 18-34                                 | 394 617 (24.47%)   | 383 744 (27.47%)     | 10 873 (5.05%) <sup>***</sup>   |
| 35-44                                 | 411 201 (25.50%)   | 376 307 (26.94%)     | 34 894 (16.19%) <sup>***</sup>  |
| 45-54                                 | 451 159 (27.98%)   | 372 585 (26.67%)     | 78 574 (36.46%) <sup>***</sup>  |
| 55-64                                 | 355 421 (22.04%)   | 264 282 (18.92%)     | 91 139 (42.30%) <sup>***</sup>  |
| Female, n (%)                         | 623 335 (38.66%)   | 550 081 (39.38%)     | 73 254 (34.00%) <sup>***</sup>  |
| Urban residency, n (%)                | 1 489 709 (92.39%) | 1 294 879 (92.70%)   | 194 830 (90.42%) <sup>***</sup> |
| <b>Census regions, n (%)</b>          |                    |                      |                                 |
| Northeast                             | 239 802 (14.87%)   | 211 483 (15.14%)     | 28 319 (13.14%) <sup>***</sup>  |
| Midwest                               | 387 301 (24.02%)   | 334 612 (23.95%)     | 52 689 (24.45%) <sup>***</sup>  |
| South                                 | 694 461 (43.07%)   | 585 403 (41.91%)     | 109 058 (50.61%) <sup>***</sup> |
| West                                  | 283 790 (17.60%)   | 259 426 (18.57%)     | 24 364 (11.31%) <sup>***</sup>  |
| <b>COVID-19 diagnosis, n (%)</b>      | 144 896 (8.99%)    | 118 940 (8.51%)      | 25 956 (12.05%) <sup>***</sup>  |
| <b>Comorbidities, n (%)</b>           |                    |                      |                                 |
| Myocardial infarction                 | 8 243 (0.51%)      | 2 901 (0.21%)        | 5342 (2.48%) <sup>***</sup>     |
| Congestive heart failure              | 8648 (0.54%)       | 2378 (0.17%)         | 6270 (2.91%) <sup>***</sup>     |
| Peripheral vascular disease           | 7538 (0.47%)       | 2959 (0.21%)         | 4579 (2.13%) <sup>***</sup>     |
| Cerebrovascular disease               | 2538 (0.16%)       | 944 (0.07%)          | 1594 (0.74%) <sup>***</sup>     |
| Dementia                              | 119 (0.01%)        | 56 (0.00%)           | 63 (0.03%) <sup>***</sup>       |
| Chronic pulmonary disease             | 36 105 (2.24%)     | 24 416 (1.75%)       | 11 689 (5.42%) <sup>***</sup>   |
| Rheumatic disease                     | 9912 (0.61%)       | 7154 (0.51%)         | 2758 (1.28%) <sup>***</sup>     |
| Peptic ulcer disease                  | 1322 (0.08%)       | 767 (0.05%)          | 555 (0.26%) <sup>***</sup>      |
| Mild liver disease                    | 14 064 (0.87%)     | 8241 (0.59%)         | 5823 (2.70%) <sup>***</sup>     |
| Diabetes without chronic complication | 91 093 (5.65%)     | 41 273 (2.95%)       | 49 820 (23.12%) <sup>***</sup>  |
| Diabetes with chronic complication    | 18 362 (1.14%)     | 6706 (0.48%)         | 11 656 (5.41%) <sup>***</sup>   |
| Hemiplegia or paraplegia              | 1284 (0.08%)       | 554 (0.04%)          | 730 (0.34%) <sup>***</sup>      |
| Renal disease                         | 10 807 (0.67%)     | 2459 (0.18%)         | 8348 (3.87%) <sup>***</sup>     |
| Any malignancy                        | 25 244 (1.57%)     | 17 617 (1.26%)       | 7627 (3.54%) <sup>***</sup>     |
| Moderate or severe liver disease      | 767 (0.05%)        | 372 (0.03%)          | 395 (0.18%) <sup>***</sup>      |
| Metastatic solid tumor                | 3396 (0.21%)       | 2212 (0.16%)         | 1184 (0.55%) <sup>***</sup>     |
| AIDS/HIV                              | 3447 (0.21%)       | 2527 (0.18%)         | 920 (0.43%) <sup>***</sup>      |

44

45 Abbreviations: SD, standard deviation.

46 <sup>a</sup> We used the Wilcoxon nonparametric rank-sum test to test the differences in means for continuous variables, and  
 47 the Pearson's chi-square test to test differences in proportions for categorical variables by medication nonadherence  
 48 to antihypertensive drug status. \*\*\*  $P < 0.001$

49 **Table 2.** Total Medical Costs and Health Care Utilization Associated With Hypertension, 2021<sup>a</sup>

|                                                | All                     | Without COVID-19 diagnosis | With COVID-19 diagnosis   | With COVID-19 vs without COVID-19 |
|------------------------------------------------|-------------------------|----------------------------|---------------------------|-----------------------------------|
| <b>Total medical costs, \$</b>                 |                         |                            |                           |                                   |
| Without hypertension                           | 9056                    | 8228                       | 17 446                    | 9219***                           |
|                                                | (8724 to 9387)          | (7945 to 8510)             | (16 518 to 18 374)        | (8519 to 9918)                    |
| With hypertension                              | 17 779                  | 16 401                     | 31 736                    | 15 335***                         |
|                                                | (17 131 to 18 426)      | (15 830 to 16 971)         | (29 801 to 33 671)        | (13 718 to 16 952)                |
| Difference <sup>b</sup>                        | <b>8723***</b>          | <b>8173***</b>             | <b>14 290***</b>          | <b>6117***</b>                    |
|                                                | <b>(8352 to 9093)</b>   | <b>(7831 to 8515)</b>      | <b>(12 888 to 15 691)</b> | <b>(4780 to 7453)</b>             |
| Observations                                   | 1 612 398               | 1 467 502                  | 144 896                   | 1 612 398                         |
| <b>Health care utilization</b>                 |                         |                            |                           |                                   |
| <b>Number of emergency department visits</b>   |                         |                            |                           |                                   |
| Without hypertension                           | 0.176                   | 0.148                      | 0.461                     | 0.313***                          |
|                                                | (0.175 to 0.177)        | (0.147 to 0.149)           | (0.454 to 0.468)          | (0.306 to 0.320)                  |
| With hypertension                              | 0.388                   | 0.348                      | 0.789                     | 0.441***                          |
|                                                | (0.383 to 0.392)        | (0.344 to 0.352)           | (0.767 to 0.811)          | (0.419 to 0.463)                  |
| Difference <sup>b</sup>                        | <b>0.211***</b>         | <b>0.200***</b>            | <b>0.328***</b>           | <b>0.128***</b>                   |
|                                                | <b>(0.207 to 0.216)</b> | <b>(0.195 to 0.204)</b>    | <b>(0.305 to 0.351)</b>   | <b>(0.105 to 0.151)</b>           |
| Observations                                   | 1 612 398               | 1 467 502                  | 144 896                   | 1 612 398                         |
| <b>Number of inpatient admissions</b>          |                         |                            |                           |                                   |
| Without hypertension                           | 0.0476                  | 0.0297                     | 0.229                     | 0.199***                          |
|                                                | (0.0443 to 0.0508)      | (0.0280 to 0.0313)         | (0.208 to 0.249)          | (0.180 to 0.218)                  |
| With hypertension                              | 0.156                   | 0.111                      | 0.604                     | 0.492***                          |
|                                                | (0.146 to 0.165)        | (0.105 to 0.117)           | (0.549 to 0.658)          | (0.442 to 0.542)                  |
| Difference <sup>b</sup>                        | <b>0.108***</b>         | <b>0.0817***</b>           | <b>0.375***</b>           | <b>0.293***</b>                   |
|                                                | <b>(0.101 to 0.115)</b> | <b>(0.0772 to 0.0861)</b>  | <b>(0.337 to 0.413)</b>   | <b>(0.259 to 0.328)</b>           |
| Observations                                   | 1 612 398               | 1 467 502                  | 144 896                   | 1 612 398                         |
| <b>Number of outpatient visits</b>             |                         |                            |                           |                                   |
| Without hypertension                           | 8.522                   | 8.223                      | 11.55                     | 3.329***                          |
|                                                | (8.505 to 8.539)        | (8.207 to 8.240)           | (11.48 to 11.62)          | (3.260 to 3.399)                  |
| With hypertension                              | 13.94                   | 13.66                      | 16.81                     | 3.151***                          |
|                                                | (13.88 to 14.01)        | (13.60 to 13.73)           | (16.61 to 17.02)          | (2.937 to 3.365)                  |
| Difference <sup>b</sup>                        | <b>5.422***</b>         | <b>5.438***</b>            | <b>5.260***</b>           | -0.178                            |
|                                                | <b>(5.357 to 5.486)</b> | <b>(5.370 to 5.505)</b>    | <b>(5.043 to 5.477)</b>   | <b>(-0.402 to 0.0467)</b>         |
| Observations                                   | 1 612 398               | 1 467 502                  | 144 896                   | 1 612 398                         |
| <b>Number of outpatient prescription drugs</b> |                         |                            |                           |                                   |
| Without hypertension                           | 9.824                   | 9.596                      | 12.13                     | 2.536***                          |
|                                                | (9.802 to 9.845)        | (9.574 to 9.617)           | (12.05 to 12.21)          | (2.459 to 2.613)                  |
| With hypertension                              | 20.67                   | 20.40                      | 23.39                     | 2.988***                          |
|                                                | (20.58 to 20.76)        | (20.31 to 20.50)           | (23.09 to 23.69)          | (2.677 to 3.299)                  |
| Difference <sup>b</sup>                        | <b>10.85***</b>         | <b>10.81***</b>            | <b>11.26***</b>           | <b>0.452**</b>                    |
|                                                | <b>(10.75 to 10.94)</b> | <b>(10.71 to 10.91)</b>    | <b>(10.95 to 11.57)</b>   | <b>(0.132 to 0.772)</b>           |
| Observations                                   | 1 612 398               | 1 467 502                  | 144 896                   | 1 612 398                         |

50  
51

\*\*\*  $P < 0.001$ , \*\*  $P < 0.01$ , \*  $P < 0.05$ .

52 <sup>a</sup> We used a generalized linear model for total medical costs and a negative binomial model for the number of  
53 emergency department visits, inpatient admissions, outpatient visits, and outpatient prescription drugs. All estimates  
54 were average marginal effects with 95% confidence interval (CI), adjusting patients' age groups, sex, urbanicity of  
55 residence, Census regions, and comorbidities.

56  
57 <sup>b</sup> The differences in the predicted values, ie, average marginal effects associated with hypertension.  
58

**Table 3.** Productivity Losses and Costs Associated With Hypertension, 2021<sup>a</sup>

|                                                  | All                     | Without COVID-19 diagnosis | With COVID-19 diagnosis | With COVID-19 vs without COVID-19 |
|--------------------------------------------------|-------------------------|----------------------------|-------------------------|-----------------------------------|
| <b>Sick Absences (days)</b>                      |                         |                            |                         |                                   |
| Without hypertension                             | 2.181                   | 1.990                      | 3.870                   | 1.880***                          |
|                                                  | (2.137 to 2.225)        | (1.950 to 2.031)           | (3.658 to 4.081)        | (1.668 to 2.091)                  |
| With hypertension                                | 3.396                   | 3.220                      | 4.952                   | 1.732***                          |
|                                                  | (3.255 to 3.536)        | (3.078 to 3.361)           | (4.426 to 5.478)        | (1.193 to 2.270)                  |
| Difference <sup>b</sup>                          | <b>1.215***</b>         | <b>1.230***</b>            | <b>1.082***</b>         | -0.148                            |
|                                                  | <b>(1.068 to 1.362)</b> | <b>(1.083 to 1.377)</b>    | <b>(0.514 to 1.650)</b> | <b>(-0.727 to 0.431)</b>          |
| Observations                                     | 139 490                 | 125 345                    | 14 145                  | 139 490                           |
| <b>STD (days)</b>                                |                         |                            |                         |                                   |
| Without hypertension                             | 2.736                   | 2.349                      | 6.699                   | 4.351***                          |
|                                                  | (2.628 to 2.844)        | (2.262 to 2.435)           | (6.212 to 7.186)        | (3.903 to 4.799)                  |
| With hypertension                                | 6.416                   | 5.815                      | 12.58                   | 6.763***                          |
|                                                  | (6.082 to 6.750)        | (5.506 to 6.123)           | (10.99 to 14.16)        | (5.195 to 8.331)                  |
| Difference <sup>b</sup>                          | <b>3.680***</b>         | <b>3.466***</b>            | <b>5.878***</b>         | <b>2.412**</b>                    |
|                                                  | <b>(3.381 to 3.980)</b> | <b>(3.184 to 3.748)</b>    | <b>(4.312 to 7.444)</b> | <b>(0.837 to 3.987)</b>           |
| Observations                                     | 1 355 064               | 1 234 579                  | 120 485                 | 1 355 064                         |
| <b>LTD (days)</b>                                |                         |                            |                         |                                   |
| Without hypertension                             | 0.842                   | 0.703                      | 2.236                   | 1.533                             |
|                                                  | (-1.676 to 3.361)       | (-1.330 to 2.736)          | (-5.617 to 10.09)       | (-4.508 to 7.574)                 |
| With hypertension                                | 2.470                   | 1.996                      | 7.216                   | 5.220                             |
|                                                  | (-4.927 to 9.866)       | (-3.764 to 7.757)          | (-18.31 to 32.75)       | (-15.26 to 25.70)                 |
| Difference <sup>b</sup>                          | 1.627                   | 1.293                      | 4.980                   | 3.687                             |
|                                                  | (-3.268 to 6.522)       | (-2.449 to 5.034)          | (-12.93 to 22.89)       | (-11.04 to 18.41)                 |
| Observations                                     | 1 331 963               | 1 211 127                  | 120 836                 | 1 331 963                         |
| <b>Productivity associated costs<sup>c</sup></b> |                         |                            |                         |                                   |
| <b>Sick absence costs, \$</b>                    |                         |                            |                         |                                   |
| Without hypertension                             | 534.0                   | 487.3                      | 947.5                   | 460.2***                          |
|                                                  | (521.0 to 547.0)        | (475.4 to 499.2)           | (885.2 to 1010)         | (397.9 to 522.5)                  |
| With hypertension                                | 831.3                   | 788.4                      | 1212                    | 423.8***                          |
|                                                  | (790.1 to 872.5)        | (746.8 to 829.9)           | (1056 to 1368)          | (264.3 to 583.3)                  |
| Difference <sup>b</sup>                          | <b>297.3***</b>         | <b>301.0***</b>            | <b>264.6**</b>          | -36.43                            |
|                                                  | <b>(254.1 to 340.6)</b> | <b>(257.9 to 344.2)</b>    | <b>(96.50 to 432.7)</b> | <b>(-207.7 to 134.9)</b>          |
| Observations                                     | 139 490                 | 125 345                    | 14 145                  | 139 490                           |
| <b>STD costs, \$</b>                             |                         |                            |                         |                                   |
| Without hypertension                             | 469.0                   | 402.6                      | 1149                    | 746.0***                          |
|                                                  | (454.6 to 483.3)        | (391.2 to 414.1)           | (1084 to 1213)          | (686.7 to 805.3)                  |
| With hypertension                                | 1100                    | 996.9                      | 2156                    | 1160***                           |
|                                                  | (1056 to 1144)          | (956.0 to 1038)            | (1946 to 2367)          | (951.8 to 1367)                   |
| Difference <sup>b</sup>                          | <b>631.0***</b>         | <b>594.2***</b>            | <b>1008***</b>          | <b>413.6***</b>                   |
|                                                  | <b>(591.4 to 670.7)</b> | <b>(556.9 to 631.6)</b>    | <b>(800.3 to 1215)</b>  | <b>(205.0 to 622.2)</b>           |
| Observations                                     | 1 355 064               | 1 234 579                  | 120 485                 | 1 355 064                         |
| <b>LTD costs, \$</b>                             |                         |                            |                         |                                   |
| Without hypertension                             | 123.8                   | 103.4                      | 328.8                   | 225.4                             |
|                                                  | (-190.4 to 438.1)       | (-150.3 to 357.1)          | (-650.8 to 1308)        | (-527.9 to 978.7)                 |
| With hypertension                                | 363.1                   | 293.5                      | 1061                    | 767.7                             |
|                                                  | (-559.8 to 1286)        | (-425.3 to 1012)           | (-2124 to 4246)         | (-1787 to 3322)                   |
| Difference <sup>b</sup>                          | 239.3                   | 190.1                      | 732.4                   | 542.3                             |



|              |                   |                   |                   |                   |
|--------------|-------------------|-------------------|-------------------|-------------------|
|              | (-371.5 to 850.1) | (-276.8 to 657.0) | (-1,502 to 2,967) | (-1,294 to 2,379) |
| Observations | 1 331 963         | 1 211 127         | 120 836           | 1 331 963         |

Abbreviations: LTD, long-term disability; STD, short-term disability.

\*\*\* p<0.001, \*\* p<0.01, \* p<0.05

<sup>a</sup> A negative binomial model was used for the number of sick absences, STD, and LTD. A generalized linear model for costs associated with sick absences, STD, and LTD. All estimates were average marginal effects with 95% confidence interval (CI), adjusting patients' age groups, sex, urbanicity of residence, Census regions, and comorbidities.

<sup>b</sup> The differences in the predicted values, ie, average marginal effects associated with hypertension.

<sup>c</sup> The productivity costs associated with sick absences, STD, and LTD were obtained by multiplying the number of hours of sick absences, STD, and LTD by the average hourly wage in 2021. Adjustments for absences associated with short-term (70% of hourly wage) and long-term (60% of hourly wage) disability were made. The average hourly wage for all employees on private nonfarm payrolls was derived from the US Bureau of Labor Statistics.

## Supplemental Materials

### eTable 1. The ICD-10-CM for Hypertension and ICD-10-CM, DRG, and ICD-10-PCS Procedure Codes Used for Pregnancy Exclusion

|              | ICD-10-CM                                                          | DRG                                                                            | ICD-10-PCS Procedure                                                                           |
|--------------|--------------------------------------------------------------------|--------------------------------------------------------------------------------|------------------------------------------------------------------------------------------------|
| Hypertension | I10-I15                                                            | NA                                                                             | NA                                                                                             |
| Pregnancy    | O00-O99, O9A1-O9A5, Z33, Z34, Z36, Z37, Z3201, Z322, Z39, F53, A34 | 765, 766, 767, 768, 769, 770, 771, 772, 773, 775, 776, 777, 779, 780, 781, 782 | 10A0, 10D00Z0, 10D00Z1, 10D00Z2, 10D07Z3, 10D07Z4, 10D07Z5, 10D07Z6, 10D07Z7, 10D07Z8, 10E0XZZ |

Abbreviations: CM, clinical modification; DRG, diagnosis-related group; ICD, International Classification of Diseases; NA, not available; PCS, procedure coding system.

**eTable 2.** Productivity Losses and Costs Associated With Hypertension Using a Zero-Inflated Negative Binomial and a Two-Part Model, 2021<sup>a</sup>

|                                                  | All                                        | Without COVID-19 diagnosis                 | With COVID-19 diagnosis                    | With COVID-19 vs without COVID-19            |
|--------------------------------------------------|--------------------------------------------|--------------------------------------------|--------------------------------------------|----------------------------------------------|
| <b>Sick absences (days)</b>                      |                                            |                                            |                                            |                                              |
| Without hypertension                             | 2.163<br>(2.114 to 2.212)                  | 2.028<br>(1.979 to 2.076)                  | 3.360<br>(3.200 to 3.520)                  | 1.332***<br>(1.173 to 1.492)                 |
| With hypertension                                | 3.180<br>(3.018 to 3.342)                  | 3.069<br>(2.898 to 3.240)                  | 4.163<br>(3.775 to 4.550)                  | 1.094***<br>(0.685 to 1.503)                 |
| Difference <sup>b</sup>                          | 1.017***<br>(0.845 to 1.190)               | 1.041***<br>(0.860 to 1.223)               | 0.803***<br>(0.387 to 1.219)               | -0.239<br>(-0.676 to 0.199)                  |
| Observations                                     | 139 490                                    | 125 345                                    | 14 145                                     | 139 490                                      |
| <b>STD (days)</b>                                |                                            |                                            |                                            |                                              |
| Without hypertension                             | 2.958<br>(2.924 to 2.993)                  | 3.015<br>(2.978 to 3.051)                  | 2.381<br>(2.331 to 2.432)                  | -0.633***<br>(-0.691 to -0.576)              |
| With hypertension                                | 3.398<br>(3.337 to 3.459)                  | 3.424<br>(3.359 to 3.488)                  | 3.130<br>(3.032 to 3.229)                  | -0.293***<br>(-0.400 to -0.187)              |
| Difference <sup>b</sup>                          | <b>0.439***</b><br><b>(0.375 to 0.504)</b> | <b>0.409***</b><br><b>(0.340 to 0.478)</b> | <b>0.749***</b><br><b>(0.641 to 0.857)</b> | <b>0.340***</b><br><b>(0.219 to 0.461)</b>   |
| Observations                                     | 1 355 064                                  | 1 234 579                                  | 120 485                                    | 1 355 064                                    |
| <b>LTD (days)</b>                                |                                            |                                            |                                            |                                              |
| Without hypertension                             | 0.456<br>(0.426 to 0.486)                  | 0.459<br>(0.427 to 0.491)                  | 0.427<br>(0.384 to 0.470)                  | -0.0318<br>(-0.0803 to 0.0167)               |
| With hypertension                                | 0.469<br>(0.440 to 0.498)                  | 0.464<br>(0.435 to 0.493)                  | 0.514<br>(0.448 to 0.581)                  | 0.0504<br>(-0.0155 to 0.116)                 |
| Difference <sup>b</sup>                          | 0.0125<br>(-0.0206 to 0.0456)              | 0.00508<br>(-0.0303 to 0.0404)             | 0.0873*<br>(0.0122 to 0.162)               | <b>0.0822*</b><br><b>(0.000322 to 0.164)</b> |
| Observations                                     | 1 331 963                                  | 1 211 127                                  | 120 836                                    | 1 331 963                                    |
| <b>Productivity associated costs<sup>c</sup></b> |                                            |                                            |                                            |                                              |
| <b>Sick absence costs, \$</b>                    |                                            |                                            |                                            |                                              |
| Without hypertension                             | 533.9<br>(522.0 to 545.9)                  | 488.1<br>(476.6 to 499.6)                  | 940.0<br>(887.8 to 992.2)                  | 451.9***<br>(399.4 to 504.5)                 |
| With hypertension                                | 826.4<br>(788.9 to 863.8)                  | 783.6<br>(745.2 to 822.0)                  | 1205<br>(1077 to 1333)                     | 421.4***<br>(290.0 to 552.9)                 |
| Difference <sup>b</sup>                          | <b>292.4***</b><br><b>(252.5 to 332.3)</b> | <b>295.5***</b><br><b>(255.0 to 336.0)</b> | <b>265.0***</b><br><b>(126.4 to 403.7)</b> | -30.50<br>(-172.2 to 111.2)                  |
| Observations                                     | 139 490                                    | 125 345                                    | 14 145                                     | 139 490                                      |
| <b>STD costs, \$</b>                             |                                            |                                            |                                            |                                              |
| Without hypertension                             | 444.6<br>(439.2 to 450.0)                  | 390.6<br>(385.3 to 396.0)                  | 997.6<br>(974.4 to 1021)                   | 607.0***<br>(583.4 to 630.6)                 |
| With hypertension                                | 1014<br>(992.5 to 1035)                    | 931.4<br>(909.7 to 953.1)                  | 1857<br>(1785 to 1930)                     | 926.0***<br>(852.3 to 999.8)                 |
| Difference <sup>b</sup>                          | <b>569.2***</b><br><b>(546.7 to 591.7)</b> | <b>540.8***</b><br><b>(518.0 to 563.6)</b> | <b>859.9***</b><br><b>(783.3 to 936.4)</b> | <b>319.1***</b><br><b>(241.5 to 396.6)</b>   |
| Observations                                     | 1 355 064                                  | 1 234 579                                  | 120 485                                    | 1 355 064                                    |
| <b>LTD costs, \$</b>                             |                                            |                                            |                                            |                                              |
| Without hypertension                             | 52.72<br>(49.19 to 56.24)                  | 48.97<br>(45.47 to 52.47)                  | 90.28<br>(75.28 to 105.3)                  | 41.30***<br>(26.09 to 56.52)                 |
| With hypertension                                | 133.2                                      | 123.2                                      | 232.8                                      | 109.6***                                     |

|                         |                         |                         |                         |                         |
|-------------------------|-------------------------|-------------------------|-------------------------|-------------------------|
|                         | (121.4 to 144.9)        | (111.4 to 135.1)        | (189.7 to 275.9)        | (65.82 to 153.3)        |
| Difference <sup>b</sup> | <b>80.47***</b>         | <b>74.28***</b>         | <b>142.5***</b>         | <b>68.25**</b>          |
|                         | <b>(67.74 to 93.19)</b> | <b>(61.58 to 86.98)</b> | <b>(96.45 to 188.6)</b> | <b>(21.88 to 114.6)</b> |
| Observations            | 1 331 963               | 1 211 127               | 120 836                 | 1 331 963               |

Abbreviations: LTD, long-term disability; STD, short-term disability.

\*\*\*  $P < 0.001$ , \*\*  $P < 0.01$ , \*  $P < 0.05$

<sup>a</sup> This table provides the same dependent variables with Table 3 but with different models for robustness check. A zero-inflated negative binomial model was used for number of sick absences, STD, and LTD. A two-part model was used, where the first part is a logistic regression model, and the second part is a generalized linear model for costs associated with sick absences, STD, and LTD. All estimates were average marginal effects with 95% confidence interval (CI), adjusting patients' age groups, sex, urbanicity of residence, Census regions, and comorbidities.

<sup>b</sup> The differences in the predicted values, ie, average marginal effects associated with hypertension.

<sup>c</sup> The productivity costs associated with sick absences, STD, and LTD were obtained by multiplying the number of hours of sick absences, STD, and LTD by the average hourly wage in 2021. Adjustments for absences associated with short-term (70% of hourly wage) and long-term (60% of hourly wage) disability were made. The average hourly wage for all employees on private nonfarm payrolls was derived from the US Bureau of Labor Statistics.

**eTable 3.** Supplementary Analysis Using 2020 Data—Total Medical Costs and Health Care Utilization Associated With Hypertension<sup>a</sup>

|                                                | All                                        | Without COVID-19 diagnosis                   | With COVID-19 diagnosis                       | With COVID-19 vs without COVID-19             |
|------------------------------------------------|--------------------------------------------|----------------------------------------------|-----------------------------------------------|-----------------------------------------------|
| <b>Total medical costs, \$</b>                 |                                            |                                              |                                               |                                               |
| Without hypertension                           | 9505<br>(9042 to 9969)                     | 8507<br>(8168 to 8847)                       | 28 984<br>(25 901 to 32 068)                  | 20 477***<br>(17 698 to 23 256)               |
| With hypertension                              | 18 467<br>(17 573 to 19 360)               | 16 583<br>(15 916 to 17 250)                 | 55 227<br>(48 912 to 61 542)                  | 38 644***<br>(32 828 to 44 460)               |
| Difference <sup>b</sup>                        | <b>8961***</b><br><b>(8478 to 9445)</b>    | <b>8076***</b><br><b>(7695 to 8457)</b>      | <b>26 243***</b><br><b>(22 237 to 30 249)</b> | <b>18 167***</b><br><b>(14 320 to 22 014)</b> |
| Observations                                   | 1 748 789                                  | 1 663 548                                    | 85 241                                        | 1 748 789                                     |
| <b>Health care utilization</b>                 |                                            |                                              |                                               |                                               |
| <b>Number of emergency department visits</b>   |                                            |                                              |                                               |                                               |
| Without hypertension                           | 0.171<br>(0.170 to 0.172)                  | 0.157<br>(0.156 to 0.158)                    | 0.445<br>(0.437 to 0.454)                     | 0.289***<br>(0.280 to 0.297)                  |
| With hypertension                              | 0.388<br>(0.384 to 0.392)                  | 0.365<br>(0.361 to 0.370)                    | 0.829<br>(0.799 to 0.859)                     | 0.464***<br>(0.434 to 0.494)                  |
| Difference <sup>b</sup>                        | <b>0.217***</b><br><b>(0.213 to 0.222)</b> | <b>0.209***</b><br><b>(0.204 to 0.213)</b>   | <b>0.384***</b><br><b>(0.353 to 0.415)</b>    | <b>0.175***</b><br><b>(0.144 to 0.207)</b>    |
| Observations                                   | 1 748 789                                  | 1 663 548                                    | 85 241                                        | 1 748 789                                     |
| <b>Number of inpatient admissions</b>          |                                            |                                              |                                               |                                               |
| Without hypertension                           | 0.0573<br>(0.0515 to 0.0630)               | 0.0337<br>(0.0314 to 0.0360)                 | 0.518<br>(0.442 to 0.594)                     | 0.485***<br>(0.410 to 0.559)                  |
| With hypertension                              | 0.203<br>(0.184 to 0.222)                  | 0.131<br>(0.123 to 0.140)                    | 1.602<br>(1.368 to 1.837)                     | 1.471***<br>(1.244 to 1.698)                  |
| Difference <sup>b</sup>                        | <b>0.146***</b><br><b>(0.133 to 0.159)</b> | <b>0.0978***</b><br><b>(0.0915 to 0.104)</b> | <b>1.084***</b><br><b>(0.918 to 1.250)</b>    | <b>0.986***</b><br><b>(0.825 to 1.147)</b>    |
| Observations                                   | 1 748 789                                  | 1 663 548                                    | 85 241                                        | 1 748 789                                     |
| <b>Number of outpatient visits</b>             |                                            |                                              |                                               |                                               |
| Without hypertension                           | 7.600<br>(7.585 to 7.615)                  | 7.441<br>(7.426 to 7.456)                    | 10.70<br>(10.62 to 10.79)                     | 3.261***<br>(3.176 to 3.346)                  |
| With hypertension                              | 12.56<br>(12.50 to 12.61)                  | 12.40<br>(12.35 to 12.46)                    | 15.64<br>(15.39 to 15.89)                     | 3.240***<br>(2.983 to 3.497)                  |
| Difference <sup>b</sup>                        | <b>4.960***</b><br><b>(4.902 to 5.017)</b> | <b>4.961***</b><br><b>(4.902 to 5.019)</b>   | <b>4.940***</b><br><b>(4.674 to 5.205)</b>    | -0.0208<br>(-0.291 to 0.249)                  |
| Observations                                   | 1 748 789                                  | 1 663 548                                    | 85 241                                        | 1 748 789                                     |
| <b>Number of outpatient prescription drugs</b> |                                            |                                              |                                               |                                               |
| Without hypertension                           | 9.783<br>(9.760 to 9.806)                  | 9.655<br>(9.632 to 9.678)                    | 12.28<br>(12.17 to 12.39)                     | 2.626***<br>(2.515 to 2.737)                  |
| With hypertension                              | 21.01<br>(20.90 to 21.11)                  | 20.84<br>(20.73 to 20.94)                    | 24.31<br>(23.87 to 24.75)                     | 3.475***<br>(3.020 to 3.929)                  |
| Difference <sup>b</sup>                        | <b>11.22***</b><br><b>(11.12 to 11.33)</b> | <b>11.18***</b><br><b>(11.07 to 11.29)</b>   | <b>12.03***</b><br><b>(11.57 to 12.49)</b>    | <b>0.849***</b><br><b>(0.382 to 1.316)</b>    |
| Observations                                   | 1 748 789                                  | 1 663 548                                    | 85 241                                        | 1 748 789                                     |

Abbreviations: LTD, long-term disability; STD, short-term disability.

\*\*\*  $pP < 0.001$ , \*\*  $P < 0.01$ , \*  $P < 0.05$ .

<sup>a</sup> We used a generalized linear model for total medical costs and a negative binomial model for the number of emergency department visits, outpatient visits, and outpatient prescription drugs. For inpatient admissions, we used a zero-inflated negative binomial model to account for excess zeros. All estimates were average marginal effects with 95% confidence interval (CI), adjusting patients' age groups, sex, urbanicity of residence, Census regions, and comorbidities. All costs were adjusted to 2021 dollars using the Consumer Price Index from the US Bureau of Labor Statistics.

<sup>b</sup> The differences in the predicted values, ie, average marginal effects associated with hypertension.

**eTable 4.** Supplementary Analysis Using 2020 Data—Productivity Losses and Costs Associated With Hypertension<sup>a</sup>

|                                                  | All                     | Without COVID-19 diagnosis | With COVID-19 diagnosis | With COVID-19 vs without COVID-19 |
|--------------------------------------------------|-------------------------|----------------------------|-------------------------|-----------------------------------|
| <b>Sick absences (days)</b>                      |                         |                            |                         |                                   |
| Without hypertension                             | 1.843                   | 1.790                      | 2.780                   | 0.990***                          |
|                                                  | (1.817 to 1.869)        | (1.765 to 1.815)           | (2.626 to 2.934)        | (0.836 to 1.144)                  |
| With hypertension                                | 2.704                   | 2.639                      | 3.841                   | 1.202***                          |
|                                                  | (2.621 to 2.786)        | (2.555 to 2.723)           | (3.437 to 4.246)        | (0.793 to 1.612)                  |
| Difference <sup>b</sup>                          | <b>0.860***</b>         | <b>0.849***</b>            | <b>1.061***</b>         | 0.212                             |
|                                                  | <b>(0.772 to 0.948)</b> | <b>(0.761 to 0.937)</b>    | <b>(0.629 to 1.494)</b> | (-0.225 to 0.650)                 |
| Observations                                     | 222 101                 | 210 181                    | 11 920                  | 222 101                           |
| <b>STD (days)</b>                                |                         |                            |                         |                                   |
| Without hypertension                             | 2.583                   | 2.367                      | 6.805                   | 4.438***                          |
|                                                  | (2.485 to 2.682)        | (2.290 to 2.444)           | (6.073 to 7.537)        | (3.750 to 5.126)                  |
| With hypertension                                | 6.155                   | 5.801                      | 13.06                   | 7.261***                          |
|                                                  | (5.846 to 6.464)        | (5.518 to 6.084)           | (10.81 to 15.31)        | (5.048 to 9.475)                  |
| Difference <sup>b</sup>                          | <b>3.572***</b>         | <b>3.434***</b>            | <b>6.258***</b>         | <b>2.824*</b>                     |
|                                                  | <b>(3.292 to 3.851)</b> | <b>(3.169 to 3.699)</b>    | <b>(4.108 to 8.408)</b> | <b>(0.674 to 4.973)</b>           |
| Observations                                     | 1 521 915               | 1 447 756                  | 74 159                  | 1 521 915                         |
| <b>LTD (days)</b>                                |                         |                            |                         |                                   |
| Without hypertension                             | 0.439                   | 0.441                      | 0.397                   | -0.0447                           |
|                                                  | (0.412 to 0.466)        | (0.413 to 0.469)           | (0.335 to 0.459)        | (-0.109 to 0.0198)                |
| With hypertension                                | 0.447                   | 0.451                      | 0.378                   | -0.0734*                          |
|                                                  | (0.405 to 0.490)        | (0.407 to 0.495)           | (0.316 to 0.440)        | (-0.138 to -0.00932)              |
| Difference <sup>b</sup>                          | 0.00832                 | 0.00976                    | -0.0190                 | -0.0287                           |
|                                                  | (-0.0322 to 0.0488)     | (-0.0323 to 0.0518)        | (-0.103 to 0.0651)      | (-0.119 to 0.0620)                |
| Observations                                     | 1 470 046               | 1 396 791                  | 73 255                  | 1 470 046                         |
| <b>Productivity associated costs<sup>c</sup></b> |                         |                            |                         |                                   |
| <b>Sick absence costs, \$</b>                    |                         |                            |                         |                                   |
| Without hypertension                             | 453.2                   | 440.1                      | 684.8                   | 244.7***                          |
|                                                  | (445.3 to 461.1)        | (432.4 to 447.8)           | (637.1 to 732.4)        | (197.0 to 292.4)                  |
| With hypertension                                | 665.1                   | 649.2                      | 946.1                   | 296.9***                          |
|                                                  | (639.5 to 690.7)        | (623.4 to 675.0)           | (820.0 to 1,072)        | (169.3 to 424.6)                  |
| Difference <sup>b</sup>                          | <b>211.9***</b>         | <b>209.1***</b>            | <b>261.3***</b>         | 52.25                             |
|                                                  | <b>(184.7 to 239.0)</b> | <b>(181.8 to 236.3)</b>    | <b>(126.4 to 396.2)</b> | (-83.98 to 188.5)                 |
| Observations                                     | 222 101                 | 210 181                    | 11 920                  | 222 101                           |
| <b>STD costs, \$</b>                             |                         |                            |                         |                                   |
| Without hypertension                             | 444.7                   | 407.5                      | 1172                    | 764.2***                          |
|                                                  | (432.2 to 457.3)        | (397.8 to 417.2)           | (1079 to 1265)          | (677.0 to 851.4)                  |
| With hypertension                                | 1060                    | 998.7                      | 2249                    | 1251***                           |
|                                                  | (1020 to 1099)          | (962.9 to 1035)            | (1964 to 2535)          | (969.9 to 1531)                   |
| Difference <sup>b</sup>                          | <b>614.9***</b>         | <b>591.2***</b>            | <b>1078***</b>          | <b>486.3***</b>                   |
|                                                  | <b>(579.6 to 650.3)</b> | <b>(557.7 to 624.8)</b>    | <b>(805.0 to 1350)</b>  | <b>(213.9 to 758.7)</b>           |
| Observations                                     | 1 521 915               | 1 447 756                  | 74 159                  | 1 521 915                         |
| <b>LTD costs, \$</b>                             |                         |                            |                         |                                   |
| Without hypertension                             | 97.21                   | 90.79                      | 219.7                   | 128.9                             |
|                                                  | (-36.18 to 230.6)       | (-29.58 to 211.2)          | (-213.0 to 652.4)       | (-205.8 to 463.6)                 |
| With hypertension                                | 281.2                   | 263.3                      | 622.6                   | 359.4                             |

|                         |                   |                   |                  |                  |
|-------------------------|-------------------|-------------------|------------------|------------------|
|                         | (-102.9 to 665.2) | (-84.64 to 611.1) | (-677.6 to 1923) | (-686.2 to 1405) |
| Difference <sup>b</sup> | 184.0             | 172.5             | 403.0            | 230.5            |
|                         | (-70.17 to 438.1) | (-58.48 to 403.4) | (-528.1 to 1334) | (-556.1 to 1017) |
| Observationss           | 1 470 046         | 1 396 791         | 73 255           | 1 470 046        |

Abbreviations: LTD, long-term disability; STD, short-term disability.

\*\*\*  $Pp < 0.001$ , \*\*  $P < 0.01$ , \*  $P < 0.05$ .

<sup>a</sup> A negative binomial model was used for the number of sick absences and STD. For number of LTD, we used a zero-inflated negative binomial model. A generalized linear model for costs associated with sick absences, STD, and LTD. All estimates were average marginal effects with 95% confidence interval (CI), adjusting patients' age groups, sex, urbanicity of residence, Census regions, and comorbidities. All costs were adjusted to 2021 dollars using the Consumer Price Index from the US Bureau of Labor Statistics.

<sup>b</sup> The differences in the predicted values, ie, average marginal effects associated with hypertension.

<sup>c</sup> The productivity costs associated with sick absences, STD, and LTD were obtained by multiplying the number of hours of sick absences, STD, and LTD by the average hourly wage in 2020. Adjustments for absences associated with short-term (70% of hourly wage) and long-term (60% of hourly wage) disability were made. The average hourly wage for all employees on private nonfarm payrolls was derived from the US Bureau of Labor Statistics.
